# Supplementary material
Source: Copernicus journal article supplement (doi:10.5194/egusphere-2026-3008)
Supplement: Supplementary file 1 [file egusphere-2026-3008-supplement.pdf]

1 **Table S1.** List of variables analyzed in this study and their corresponding model variable names under SSP245,  
 2 SSP585, G6-1.5K-SAI, G6solar, G6sulfur, and Geo-SAI scenarios. (ET is QSOIL+QVEGE+ QVEGT).

| Variable name      | SSP245         | SSP585  | G6-1.5K-SAI    | G6solar | G6sulfur | Geo-SAI        |
|--------------------|----------------|---------|----------------|---------|----------|----------------|
| Temperature        | TSA            | tas     | TSA            | tas     | tas      | TSA            |
| Precipitation      | pr             | pr      | PRECT          | pr      | pr       | PRECT          |
| Evapotranspiration | ET             | evspsbl | ET             | evspsbl | evspsbl  | ET             |
| Available water    | P – ET         | P – ET  | P – ET         | P – ET  | P – ET   | P – ET         |
| Snowfall flux      | prsn           | prsn    | PRECSC+PRECSL  | prsn    | prsn     | PRECSC+PRECSL  |
| Snow melt flux     | snm            | snm     | QSNOMELT       | snm     | snm      | QSNOMELT       |
| Runoff             | QOVER          | mrros   | QOVER          | mrros   | mrros    | QOVER          |
| Soil moisture      | SOILWATER_10CM | mrsos   | SOILWATER_10CM | mrsos   | mrsos    | SOILWATER_10CM |
| Leaf area index    | TLAI           | lai     | TLAI           | lai     | lai      | TLAI           |

3 **Table S2.** Summary of stratospheric sulfur injection characteristics for CESM2 experiments used in this study.  
 4 Injection rates represent approximate mean values over 2055–2084. Differences in injection amount, location,  
 5 and strategy reflect distinct experimental objectives (temperature stabilization vs transient forcing), which are  
 6 accounted for through normalization by sulfur injection. (Lee et al., 2025; Tilmes et al., 2020; Visioni et al.,  
 7 2021; Visioni et al., 2024).

| Experiment                 | Baseline Scenario    | Injection Locations | Injection Strategy      | Injection Locations    | Injection Altitude (km) | Mean Injection Rate (Tg SO <sub>2</sub> yr <sup>-1</sup> ) | Notes                                                                                |
|----------------------------|----------------------|---------------------|-------------------------|------------------------|-------------------------|------------------------------------------------------------|--------------------------------------------------------------------------------------|
| G6-1.5K-SAI                | SSP2-4.5             | Stabilized at 1.5°C | Feedback-controlled SAI | 30°N, 30°S             | ~21–25                  | ~11.7                                                      | Designed to maintain global temperature at 1.5°C; symmetric subtropical injection    |
| G6sulfur                   | SSP5-8.5 vs SSP2-4.5 | Transient offset    | Feedback-controlled SAI | 10°N–10°S              | ~25                     | ~21                                                        | Injection increases over time to offset SSP5-8.5 warming toward SSP2-4.5             |
| Geo-SAI (Geo SSP5-8.5 1.5) | SSP5-8.5             | Stabilized at 1.5°C | Feedback-controlled SAI | 15°N, 15°S, 30°N, 30°S | ~20–25                  | ~25–35                                                     | Higher injection due to strong baseline forcing; peaks up to ~48 Tg yr <sup>-1</sup> |

8

9 **Table S3.** Statistical performance (R<sup>2</sup> values) of multiple linear regression models for AW under SSP2-4.5 and  
 10 G6-1.5K-SAI scenarios across WCA, ECA, TP, and SA. The table reports minimum, maximum, average, and  
 11 final R<sup>2</sup> values representing model strength and predictive accuracy in each region.

| Region                 | SSP2-4.5 |       |       |       | G6-1.5K-SAI |       |       |       |
|------------------------|----------|-------|-------|-------|-------------|-------|-------|-------|
|                        | WCA      | ECA   | TIB   | SAS   | WCA         | ECA   | TIB   | SAS   |
| Min R <sup>2</sup>     | 0.976    | 0.615 | 0.963 | 0.975 | 0.999       | 0.550 | 0.977 | 0.998 |
| Max R <sup>2</sup>     | 0.978    | 0.999 | 0.969 | 0.977 | 0.999       | 0.999 | 0.999 | 0.999 |
| Average R <sup>2</sup> | 0.977    | 0.807 | 0.966 | 0.976 | 0.999       | 0.775 | 0.988 | 0.998 |
| Final R <sup>2</sup>   | 0.978    | 0.999 | 0.968 | 0.977 | 0.999       | 0.999 | 0.997 | 0.999 |

12 **Table S4.** Same as Table S1, but for SSP5-8.5 and G6solar.

| Region             | SSP5-8.5 |       |       |       | G6solar |       |       |       |
|--------------------|----------|-------|-------|-------|---------|-------|-------|-------|
|                    | WCA      | ECA   | TIB   | SAS   | WCA     | ECA   | TIB   | SAS   |
| Min R <sup>2</sup> | 0.999    | 0.573 | 0.993 | 0.999 | 0.999   | 0.605 | 0.985 | 0.999 |
| Max R <sup>2</sup> | 0.999    | 0.999 | 0.999 | 0.999 | 0.999   | 0.999 | 0.999 | 0.999 |

|                        |       |       |       |       |       |       |       |       |
|------------------------|-------|-------|-------|-------|-------|-------|-------|-------|
| Average R <sup>2</sup> | 0.999 | 0.786 | 0.996 | 0.999 | 0.999 | 0.802 | 0.992 | 0.999 |
| Final R <sup>2</sup>   | 0.999 | 0.999 | 0.998 | 0.999 | 0.999 | 0.999 | 0.997 | 0.999 |

13

14 **Table S5.** Same as Table S1, but for G6sulfur and Geo-SAI.

| Region                 | G6sulfur |       |       |       | Geo-SAI |       |       |       |
|------------------------|----------|-------|-------|-------|---------|-------|-------|-------|
|                        | WCA      | ECA   | TIB   | SAS   | WCA     | ECA   | TIB   | SAS   |
| Min R <sup>2</sup>     | 0.999    | 0.615 | 0.988 | 0.999 | 0.999   | 0.505 | 0.982 | 0.998 |
| Max R <sup>2</sup>     | 0.999    | 0.999 | 0.999 | 0.999 | 0.999   | 0.999 | 0.999 | 0.999 |
| Average R <sup>2</sup> | 0.999    | 0.807 | 0.993 | 0.999 | 0.999   | 0.752 | 0.990 | 0.998 |
| Final R <sup>2</sup>   | 0.999    | 0.999 | 0.998 | 0.999 | 0.999   | 0.999 | 0.997 | 0.999 |

15

16 **Table S6.** Percent change (%) in peak hydroclimatic variables during the future period (2055–2084) relative to  
17 the present-day baseline (2015–2034) across WCA, ECA, TIB, and SAS. Positive (negative) values indicate  
18 increases (decreases) relative to the present-day climatology. Bold values denote statistically significant changes  
19 at the 95% level.

| region | scenario          | TMP          | PCP          | ET           | AW            | Snowfall      | Snowmelt      | Runoff       | SM           | LAI          |
|--------|-------------------|--------------|--------------|--------------|---------------|---------------|---------------|--------------|--------------|--------------|
| WCA    | SSP245            | <b>6.68</b>  | -1.43        | <b>4.29</b>  | -0.21         | <b>-9.29</b>  | <b>-19.29</b> | 0.74         | <b>-2.79</b> | <b>28.70</b> |
|        | SSP585            | <b>11.43</b> | 4.49         | <b>4.33</b>  | 7.04          | <b>-24.94</b> | <b>-28.59</b> | 2.68         | <b>-2.10</b> | <b>42.53</b> |
|        | G6-1.5K-SAI       | 0.08         | 3.26         | <b>-2.49</b> | -9.03         | <b>11.63</b>  | <b>7.10</b>   | -0.53        | <b>-1.96</b> | <b>21.59</b> |
|        | Geo-SAI           | <b>-1.18</b> | <b>10.51</b> | <b>-3.81</b> | <b>35.42</b>  | 3.68          | 3.89          | <b>5.42</b>  | <b>2.09</b>  | <b>38.30</b> |
|        | G6solar           | <b>4.20</b>  | 6.21         | -1.83        | <b>13.73</b>  | -6.50         | <b>-13.86</b> | 0.02         | -0.58        | <b>33.81</b> |
|        | G6sulfur-SSP2-4.5 | <b>5.95</b>  | 2.80         | -0.83        | <b>-24.14</b> | <b>-11.60</b> | <b>-24.09</b> | -2.36        | <b>-4.70</b> | <b>30.11</b> |
|        | G6sulfur-SSP5-8.5 | <b>4.83</b>  | <b>6.17</b>  | -0.68        | 7.59          | <b>-17.96</b> | <b>-22.81</b> | 3.09         | -1.35        | <b>35.95</b> |
| ECA    | SSP245            | <b>7.58</b>  | 1.57         | 0.95         | 7.54          | 7.01          | -2.89         | 3.43         | -0.77        | <b>10.47</b> |
|        | SSP585            | <b>13.35</b> | 3.23         | <b>2.17</b>  | <b>22.80</b>  | 4.51          | <b>-11.81</b> | <b>6.54</b>  | <b>2.52</b>  | <b>21.49</b> |
|        | G6-1.5K-SAI       | <b>-1.47</b> | -0.58        | -2.11        | <b>-49.19</b> | <b>17.84</b>  | <b>19.48</b>  | -2.84        | 0.51         | <b>7.15</b>  |
|        | Geo-SAI           | <b>-1.12</b> | <b>8.91</b>  | 0.39         | <b>30.45</b>  | 1.65          | <b>19.99</b>  | <b>9.61</b>  | <b>5.43</b>  | <b>33.66</b> |
|        | G6solar           | <b>4.14</b>  | 1.67         | -0.84        | <b>37.28</b>  | <b>10.64</b>  | 1.52          | 4.88         | <b>3.02</b>  | <b>24.39</b> |
|        | G6sulfur-SSP2-4.5 | <b>6.29</b>  | <b>8.21</b>  | 0.10         | <b>-31.47</b> | 6.19          | -4.68         | 2.69         | -0.40        | <b>24.33</b> |
|        | G6sulfur-SSP5-8.5 | <b>5.62</b>  | <b>8.37</b>  | 0.34         | <b>65.39</b>  | 0.67          | -3.44         | <b>8.38</b>  | <b>2.21</b>  | <b>27.63</b> |
| TIB    | SSP245            | <b>13.26</b> | 3.29         | <b>5.88</b>  | 6.69          | <b>-6.03</b>  | <b>-14.63</b> | <b>6.15</b>  | <b>-3.67</b> | <b>19.06</b> |
|        | SSP585            | <b>24.17</b> | <b>13.02</b> | <b>2.55</b>  | <b>18.76</b>  | <b>-9.83</b>  | <b>-26.27</b> | <b>12.38</b> | <b>-1.82</b> | <b>26.31</b> |
|        | G6-1.5K-SAI       | 1.13         | <b>-5.43</b> | 0.51         | -4.17         | <b>18.71</b>  | <b>5.91</b>   | -2.44        | <b>-3.36</b> | <b>7.44</b>  |
|        | Geo-SAI           | <b>3.91</b>  | -0.69        | <b>-2.74</b> | 2.38          | <b>9.60</b>   | 3.96          | 1.23         | <b>1.68</b>  | <b>12.70</b> |
|        | G6solar           | <b>10.71</b> | 1.04         | <b>-2.68</b> | 3.74          | -2.18         | <b>-9.93</b>  | 0.99         | 0.17         | <b>16.46</b> |
|        | G6sulfur-SSP2-4.5 | <b>13.44</b> | <b>10.51</b> | -0.94        | <b>19.06</b>  | -0.08         | <b>-9.48</b>  | <b>14.59</b> | <b>-1.25</b> | <b>19.99</b> |
|        | G6sulfur-SSP5-8.5 | <b>12.32</b> | <b>9.75</b>  | -0.10        | <b>15.26</b>  | -0.47         | <b>-10.68</b> | <b>11.22</b> | 1.09         | <b>20.03</b> |
| SAS    | SSP245            | <b>5.94</b>  | 2.07         | <b>6.52</b>  | 5.96          | <b>-29.71</b> | <b>-25.03</b> | <b>9.86</b>  | 0.39         | <b>16.29</b> |
|        | SSP585            | <b>9.89</b>  | <b>7.53</b>  | <b>4.74</b>  | <b>9.44</b>   | <b>-49.01</b> | <b>-44.31</b> | <b>12.08</b> | 0.12         | <b>32.53</b> |
|        | G6-1.5K-SAI       | <b>1.88</b>  | -3.80        | 2.35         | <b>-12.20</b> | -4.74         | -2.03         | -1.52        | -1.09        | <b>21.09</b> |
|        | Geo-SAI           | <b>1.57</b>  | 4.00         | -12.41       | <b>8.91</b>   | -5.98         | <b>-7.99</b>  | <b>8.44</b>  | -0.47        | <b>53.73</b> |
|        | G6solar           | <b>4.93</b>  | 2.17         | <b>2.61</b>  | 2.85          | <b>-24.14</b> | <b>-21.68</b> | 5.35         | -0.40        | <b>40.09</b> |
|        | G6sulfur-SSP2-4.5 | <b>3.13</b>  | <b>6.76</b>  | 20.29        | -3.25         | <b>-24.12</b> | <b>-21.25</b> | <b>15.22</b> | <b>1.82</b>  | <b>41.45</b> |
|        | G6sulfur-SSP5-8.5 | <b>4.81</b>  | <b>9.24</b>  | <b>2.65</b>  | <b>12.81</b>  | <b>-24.99</b> | <b>-19.82</b> | <b>15.55</b> | 0.77         | <b>45.06</b> |

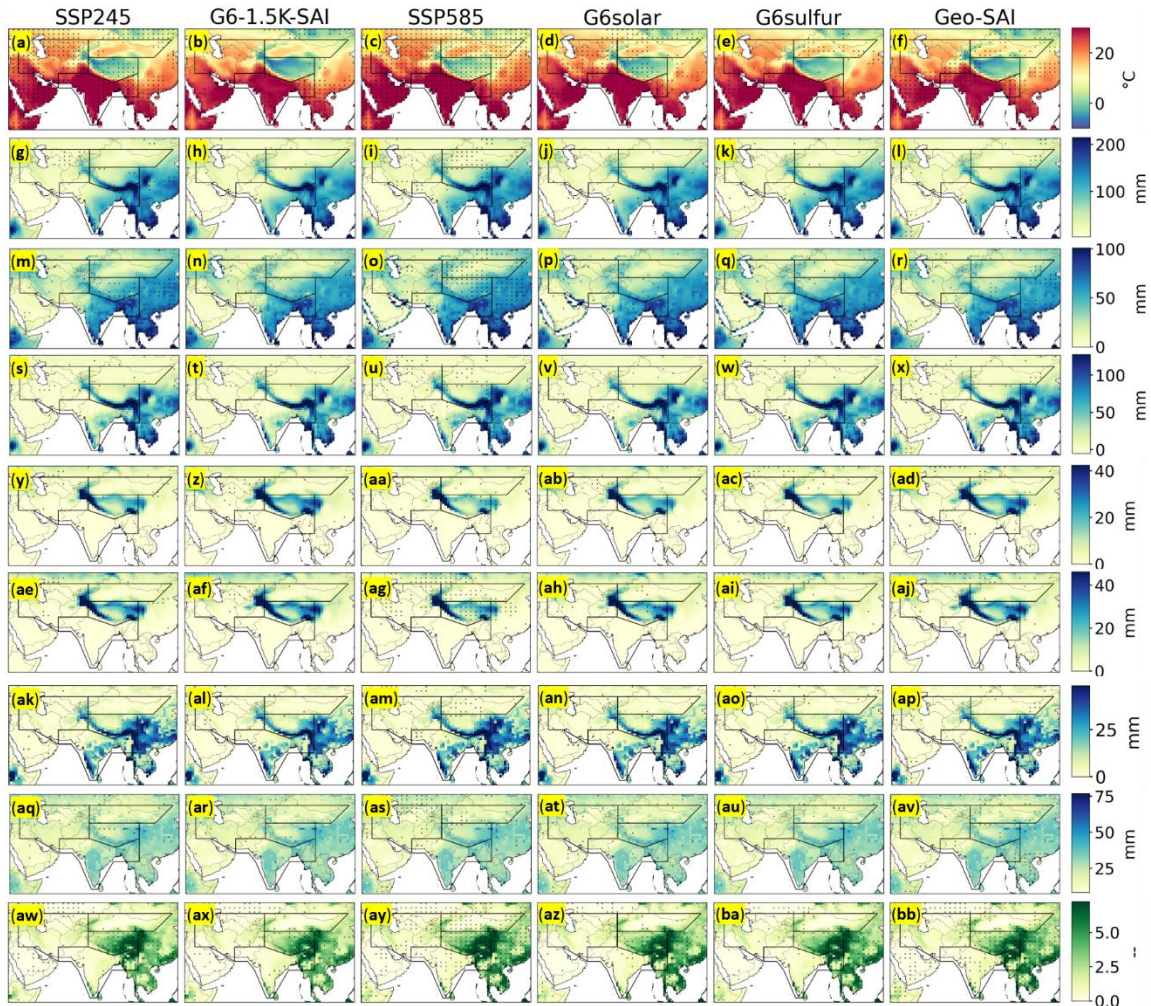

20

21 **Figure S1.** Spatial distribution of the ensemble-mean of (a-f) temperature, (g-l) precipitation, (m-r) ET, (s-x)  
 22 AW, (y-ad) snowfall flux, (ae-aj) snowmelt flux, (ak-ap) runoff, (aq-av) SM, (aw-bb) LAI, averaged over 2055–  
 23 2084 for six scenarios: SSP2-4.5, G6-1.5K-SAI, SSP5-8.5, G6solar, G6sulfur, and Geo-SAI. Dotted regions  
 24 indicate grid cells where the ensemble-mean linear trend over 2055–2084 is statistically significant at  $p < 0.05$ .
